1 Maxence S. Vincent and Stephan Uphoff

2 Department of Biochemistry, University of Oxford, South Parks Road, Oxford, OX1 3QU, UK

3 Correspondence to: maxence.vincent@bioch.ox.ac.uk; stephan.uphoff@bioch.ox.ac.uk

#### 4 **Title**

5 Cellular heterogeneity in DNA alkylation repair as a trade-off between cell survival and genetic  
6 plasticity

#### 7 **Abstract**

8 DNA repair mechanisms fulfil a dual role, as they are essential for cell survival and genome  
9 maintenance. Here, we studied how cells regulate the interplay between DNA repair and mutation.  
10 We focused on the *Escherichia coli* adaptive response that increases resistance to DNA alkylation  
11 damage. Combination of single-molecule imaging and microfluidic-based single-cell microscopy  
12 showed that noise in the gene activation timing of the master regulator Ada is accurately propagated  
13 to generate a distinct subpopulation of cells in which all proteins of the adaptive response are absent.  
14 Although lack of these proteins causes extreme sensitivity to alkylation stress, cellular heterogeneity  
15 in DNA alkylation repair provides a functional benefit by increasing the evolvability of the whole  
16 population. We demonstrated this by monitoring the dynamics of nascent mutations during alkylation  
17 stress as well as the frequency of fixed mutations that are generated by the distinct subpopulations  
18 of the adaptive response. This highlighted that evolvability is a trade-off between mutability and cell  
19 survival. Stochastic modulation of DNA repair capacity by the adaptive response solves this trade-off  
20 through the generation of a viable hypermutable subpopulation of cells that acts as a source of genetic  
21 diversity in a clonal population.

#### 22 **Introduction**

23 Genome plasticity is essential for adaptation of cells to new environments. For instance, bacteria rely  
24 on mutagenesis to evolve resistance to antibiotics [1–3] and to adapt to new host environments [4].  
25 On the other hand, maintenance of genome stability is also necessary for their survival. Hence, cells  
26 employ conserved genetic networks and stress responses to regulate repair of their DNA [5].  
27 Perturbation of DNA repair pathways by mutations or drug treatments increases the mortality and  
28 mutation rates of cells in the presence of DNA damage. Loss of repair functionality can have beneficial  
29 consequences for bacterial populations, as an increased mutation rate can enhance evolvability.  
30 Indeed, mutator strains consistently evolve during laboratory evolution experiments [6,7], and are  
31 frequently found in bacterial isolates from infected patients or the environment [8,9]. These  
32 phenotypes have been shown to arise from mutations in DNA mismatch repair, oxidative DNA damage  
33 repair, and DNA replication proofreading genes. However, although an increased mutation supply can  
34 accelerate adaptive evolution when a population is maladapted in its current environment,  
35 inactivation of genome maintenance mechanisms can lower cell fitness and lead to accumulation of  
36 deleterious mutations [10]. Besides the existence of permanent genetic mutator alleles, growing  
37 evidence suggests that cells can adopt transient hypermutable phenotypes by regulating the  
38 expression or activity of DNA repair enzymes [11–14]. Temporary upregulation of mutagenesis is  
39 believed to promote evolutionary adaptation in response to stress without compromising genetic  
40 stability in optimal environments [15,16]. Furthermore, cell subpopulations with elevated mutation  
41 rates could serve as reservoirs of increased genetic plasticity. Despite the compelling logic of this  
42 theory, whether a hypermutable subpopulation contributes significantly to the overall evolvability of  
43 the whole population depends not only on its mutation rate but also on its size, lifetime, and viability  
44 [17]. These crucial parameters are not accessible from conventional genetics assays. As such, it  
45 remains unclear if transient hypermutable phenotypes can provide evolutionary benefits, and how  
46 any such benefits compare to the evolvability of permanent genetic mutator strains.

47

48 Among the broad class of damaging compounds that can generate mutagenic DNA lesions, alkylating  
49 agents are found in the external environment [18] and are endogenously produced [19,20]. They can  
50 alter nucleobases and phosphotriester linkages of ssDNA, dsDNA and RNA in eukaryotic and  
51 prokaryotic cells [21–24]. In *E. coli* six genes have been identified to protect DNA specifically against  
52 alkylation damage. The two constitutively expressed enzymes Ogt (O<sup>6</sup>meG methyltransferase) and  
53 Tag (3meA DNA glycosylase I) provide a basal repair capacity [25–28], whereas the four adaptive  
54 response components, Ada (O<sup>6</sup>meG methyltransferase), AlkA (3meA DNA glycosylase II), AlkB (3meC  
55 dioxygenase) and AidB are induced upon alkylating stress [29–34]. *ada* and *alkB* are expressed in an  
56 operon, while *alkA* and *aidB* have separate promoters (**Fig.1 A**).

57  
58 The adaptive response is regulated through the methylation status of Ada (**Fig.1 A**). Ada is a  
59 bifunctional enzyme, exhibiting a transcription factor (TF) activity carried by its N-terminal domain  
60 (Ada-N) and an O<sup>6</sup>meG methyltransferase activity with the catalytic cysteine 321 (C321) in the C-  
61 terminal domain (Ada-C) (**Fig.1 B**). Ada-N repairs methylated phosphotriester (MPT) lesions by direct  
62 and irreversible transfer of the methyl group onto its catalytic cysteine 38 (C38). The methylation of  
63 C38 turns Ada into a transcriptional activator of the adaptive response gene network, which includes  
64 its own gene and thus leads to amplification of gene expression by positive feedback [18,35,36].

65  
66 Although the adaptive response has been characterised for decades, recent single-cell measurements  
67 uncovered unexpected cell-to-cell heterogeneity in Ada abundance [37]. Specifically, Ada exhibits  
68 large variation in gene expression between cells of isogenic *E. coli* populations [37]. As a result of gene  
69 expression noise, the basal level of Ada in absence of alkylating stress is heterogeneous, with a  
70 subpopulation of cells containing not even a single molecule of Ada. Consequently, upon alkylating  
71 stress, cells devoid of Ada are unable to activate the adaptive response until the stochastic expression  
72 of at least one Ada molecule, which can take multiple cell generations [37,38]. Cells with a delayed  
73 adaptive response exhibit higher rates of DNA replication errors, suggesting that they could act as a  
74 hypermutable subpopulation [37,39]. However, as phenotypic variation is ubiquitous in bacteria, it is  
75 difficult to know whether the heterogeneity in the adaptive response genuinely represents a beneficial  
76 evolutionary strategy or if it is a side-effect of unavoidable molecular noise. Here, we addressed this  
77 question by studying the regulation of the adaptive response and its effects on population evolvability.

78  
79

## 80 Results

### 81 Stochastic activation of Ada propagates across the whole adaptive response regulon

82 Alkylation stress causes mutagenic DNA lesions, that promote error-prone DNA replication, and toxic  
83 lesions, that block DNA replication forks and lead to cell death if left unrepaired [35]. Indeed, *E. coli*  
84 strains with deletions of individual genes of the adaptive response, namely  $\Delta alkA$ ,  $\Delta alkB$ , and  $\Delta ada-$   
85  $\Delta alkB$  (lacking the entire *ada-alkB* operon), were unable to grow on plates in the presence of the  
86 alkylating agent methyl methanesulfonate (3 mM MMS) that causes both mutagenic and toxic lesions  
87 (**Supp.1**) [35]. However, deletion of *aidB* did not affect cell survival (**Supp.1**). Considering the  
88 importance of the adaptive response for tolerance of alkylation stress, it is surprising that the master  
89 regulator Ada is so sensitive to gene expression noise that its feedback autoregulation generates large  
90 variation in Ada abundances across cells in a population after exposure to MMS [37]. As AlkA and AlkB  
91 are crucial for survival of alkylation damage (**Supp.1**), we asked whether the stochastic activation of  
92 Ada also impacts their expression. In principle, variation in the master regulator could be buffered or  
93 propagated in the gene regulatory network. To this end, we monitored the endogenous expression of  
94 functional Ada, AlkB, AlkA and AidB translational fusions to the fluorescent protein mYPet (**Supp.1**) at  
95 the single-cell level in a microfluidic device. The ‘mother machine’ setup allows imaging hundreds of  
96 single cells over tens of generations under constant growth conditions and defined stress treatments  
97 [10,39,40]. We observed that the addition of MMS in the fluidic system caused most cells to activate

98 the adaptive response regulon rapidly (termed ON-state, **Fig.1 C-E**). However, we detected a fraction  
99 of cells that delayed the activation of AlkB and AlkA expression for the duration of multiple cell cycles  
100 (termed OFF-state), despite constant treatment with a fixed concentration of MMS (**Fig.1 D-E**). This  
101 cell-to-cell heterogeneity in *alkB* and *alkA* gene induction matches the patterns seen for *ada* (**Fig. 1C-**  
102 **E**) [37]. In the conditions of our experiments, we did not detect any activation of AidB expression in  
103 response to MMS (**Fig.1 F**). Indeed, the role of *aidB* in DNA repair has been brought into question  
104 before [35,41,42], and its contribution to the alkylating stress response appears to be negligible  
105 considering that a  $\Delta aidB$  strain has the same MMS sensitivity as the wild-type (**Supp.1**).

#### 106 Fluctuations in *ada* expression are accurately propagated to *alkA*

107 The similarity of Ada and AlkB activation timing was expected because both genes are in the same  
108 operon, however, the variability observed for AlkA activation was less anticipated since both  
109 unmethylated and methylated forms of Ada have been proposed to activate AlkA [43,44]. Thus, to  
110 precisely quantify the activation times of Ada and AlkA in the same cell, we engineered dual reporter  
111 strains expressing endogenous Ada-CFP and AlkA-mYPet fusions (**Fig.2 A-B and Supp. 1**). We observed  
112 that both Ada and AlkA expression share highly correlated activation times (**Fig.2 C**). On closer  
113 inspection, we detected a ~40min activation delay for AlkA with respect to Ada (**Fig.2 D**), which  
114 indicates that Ada needs to rise in concentration first before it activates *alkA* transcription. To confirm  
115 this difference in activation times, we monitored AlkA-mYPet and an ectopic transcriptional  $P_{ada}$ -CFP  
116 fluorescent reporter. In this strain, the endogenous *ada* allele is unaltered and the activation of AlkA  
117 and  $P_{ada}$  became almost simultaneous, thereby confirming our hypothesis (**Supp.2 A,B**). We further  
118 noted that Ada and AlkA both displayed broad fluctuations in expression level in single cells with  
119 constant MMS treatment even when the cell-average expression had reached steady-state after the  
120 period of response activation (**Fig.2 B**). We previously showed that the steady-state fluctuations of  
121 Ada reflect variation in the amount of DNA damage in individual cells over time [37]. Temporal cross-  
122 correlation between Ada and AlkA signals showed that fluctuations of *ada* expression are correlated  
123 with those of *alkA* (**Fig.2 F and Supp.2 C**). As a control, we did not detect cross-correlations between  
124 Ada and AlkA signals from different random cells or between AlkA and an unrelated  $P_{RNA1}$ -mKate2  
125 fluorescent reporter (**Fig.2 F and Supp.2 C**).

#### 126 The basal level of the adaptive response proteins is low and heterogeneous

127 The propagation of stochastic Ada activation to the whole response regulon means that the cells with  
128 a delayed response (the OFF subpopulation) dwell in a state in which all proteins of the Ada regulon  
129 are only expressed at a basal level. We therefore quantified the basal expression of these proteins  
130 using a method to count translational protein fusions to the HaloTag, which can be labelled with the  
131 fluorescent ligand TMR [26]. MMS sensitivity assays confirmed the functionality of the HaloTag fusions  
132 (**Supp.1**). Chemical fixation of cells allowed us to capture long camera exposures on a custom-built  
133 single-molecule fluorescence microscope such that we were able to detect distinct fluorescent spots  
134 and count protein copy numbers per cell (**Supp.3**). The basal expression of Ada has been previously  
135 shown to be as low as 1 molecule/cell on average [37,45], which was similar to the distribution of Ada-  
136 Halo molecules/cell that we observed here (**Fig.3 A**). Single-molecule counting of AlkB-Halo revealed  
137 that most cells were completely devoid of AlkB in absence of alkylating stress (**Fig.3 B**). Only ~20 % of  
138 the population exhibited a single AlkB protein (**Fig.3 B**). This observation is surprising given the  
139 importance of AlkB for the repair of alkylation damage (**Supp.1**), however, it is not unexpected  
140 considering that *alkB* is positioned at the end of the *ada-alkB* operon and likely to be less transcribed  
141 than *ada*. We further quantified the absolute number of AlkA-Halo proteins (**Fig.3 C**). Although some  
142 cells (~5% of the population) contained too many proteins (>8) to be accurately counted, most cells in  
143 the population exhibited a low number of AlkA, with ~2.6 molecules per cell on average. As for AlkB,  
144 it is surprising that the important DNA repair protein AlkA is expressed at such low levels. Of note, we  
145 did not detect any AidB-Halo proteins in most cells (>95% of the population) (**Fig.3 D**). Overall, these

146 results demonstrate that AlkA and AlkB are necessary for the cell to survive alkylation stress (**Supp.1**)  
147 yet they are present at very low level and in many cells completely absent before induction.

#### 148 Phenotypic heterogeneity of the adaptive response appears to be an evolved property

149 Despite the apparent noisiness of the adaptive response, our results demonstrate that it is in fact a  
150 remarkably precise gene regulatory network that splits an isogenic population of cells into two  
151 phenotypically distinct and defined subpopulations. The production of single Ada molecules functions  
152 as the stochastic master switch in this network. The random timing of Ada activation in each cell is  
153 precisely transmitted to induce AlkB and AlkA expression after a further delay (**Fig.1 and Fig.2**). Cells  
154 with delayed Ada activation are essentially devoid of all adaptive response proteins because of their  
155 extremely low basal expression levels (**Fig.3**). Therefore, the OFF state is distinct and defined not just  
156 by the absence of the Ada regulator, but an all-round lack of proteins that are crucial for DNA alkylation  
157 repair. After switching to the ON state, fluctuations in Ada production are propagated such that the  
158 whole response regulon (except AidB) closely follows the state of the regulator (**Fig.1 and Fig.2**). These  
159 conclusions suggest that the stochastic phenotypic heterogeneity generated by the adaptive response  
160 is an evolved property of the system, rather than side-effect of a regulatory inaccuracy.

#### 161 Contribution of Ada, AlkB, and AlkA to genome maintenance

162 The fact that lack of AlkB and AlkA is very toxic to cells in the presence of alkylation stress (**Supp. 1**)  
163 suggests that the formation of a distinct subpopulation of cells in which these proteins are absent  
164 must have a functional purpose that outweighs the fitness costs. Nevertheless, whether heterogeneity  
165 in the adaptive response is exploited as a functional benefit for a cell population remains an open  
166 question. An interesting hypothesis is that the delay of Ada, AlkB, and AlkA activation could increase  
167 the mutation rate of certain cells and therefore provide an adaptive and heritable genetic diversity  
168 (also referred to as evolvability [46]). We previously showed that cells with a delayed adaptive  
169 response have a higher rate of DNA replication errors during MMS treatment than cells that rapidly  
170 activated the response [37,39]. To address the functional benefits of such a mechanism, we  
171 determined the contribution of each component of the adaptive response regulon to genome  
172 maintenance under alkylating stress. We used a method that enables the detection of nascent DNA  
173 replication errors making use of the fluorescently-labelled MutL-mYPet fusion protein that forms  
174 distinct fluorescent foci when bound at DNA mismatches (**Fig.4 A**) [10,39]. As shown before, delayed  
175 activation of the adaptive response causes a transient burst in the rate of DNA mismatches that lasts  
176 for ~2 hours after the addition of 1 mM MMS [39]. Unlike the wild-type, strains with the gene deletions  
177  $\Delta alkB$ ,  $\Delta alkA$ , and  $\Delta ada-alkB$  all showed elevated and sustained mismatch rates that did not recover  
178 during prolonged MMS treatment (**Fig.4 B**). Addressing the specific function of Ada in DNA repair is  
179 more complex than for AlkB and AlkA, because Ada has a dual role as an O<sup>6</sup>meG repair protein and  
180 regulator of the adaptive response. To separate these functions, we engineered an endogenous  
181 chromosomal Ada mutant, Ada<sup>C321A</sup>, that lacks the catalytic cysteine required for repair of O6meG  
182 lesions (**Supp.1**). This mutant is still able to regulate the adaptive response, which is activated by  
183 methylation of Cys38 [36,47,48]. Upon alkylating stress, O6meG repair deficiency resulted in a  
184 sustained and increased mismatch rate with respect to the WT level, but remained below the  $\Delta alkB$   
185 and  $\Delta alkA$  levels (**Fig.4 B**). Therefore, AlkB, AlkA, and Ada each provide specific DNA repair functions  
186 that are important for mutation prevention during alkylation stress.

#### 187 Contributions of Ada, AlkB, and AlkA to cell survival

188 Although mutagenesis is essential for genome evolution, individual mutant cells that emerge during  
189 stress still need to survive in order to propagate their genetic innovations. We thus examined cell  
190 survival during MMS treatment. Despite the delay in the induction of alkylation repair, cell survival of  
191 the wild-type strain was essentially unaffected at 1 mM MMS (**Fig.4 C**), owing to the constitutively  
192 expressed DNA glycosylase Tag and DNA damage tolerance pathways that are controlled by the SOS  
193 response [39]. This was not the case for the  $\Delta alkB$ ,  $\Delta alkA$ , and  $\Delta ada-alkB$  deletion mutants, with less

194 than 10% of cells surviving after 4 hours of constant MMS treatment for each of these strains (**Fig.4**  
195 **C**). This result indicates that beyond a certain level of 3meA lesions (repaired by AlkA), and 3meC and  
196 1meA lesions (repaired by AlkB), alternative repair and damage tolerance pathways cannot  
197 compensate for the lack of AlkA and AlkB. Failure to repair these lesions leads to DNA replication  
198 stalling [35,49,50], a process that is ultimately lethal to cells. On the other hand, 90% of *ada*<sup>C321A</sup> cells  
199 were alive after 4 hours of constant MMS treatment, showing that Ada's repair function protects  
200 predominantly against the mutagenic effects of alkylating stress rather than its toxicity.

#### 201 Cell-to-cell heterogeneity in the adaptive response leads to differences in genomic mutation rates

202 Our mismatch rates measurements imply that phenotypic heterogeneity in the DNA damage response  
203 causes cell-to-cell variation in mutation rates. Indeed, most DNA mismatches are repaired by the MMR  
204 system, but ~ 1% are overlooked and turn into stable mutations in the next round of replication [51].  
205 However, whether differences in DNA mismatch rates truly reflect a genuine variation in mutation  
206 rates between cells remains unknown. To address this important point, we used fluorescence  
207 activated cell-sorting (FACS) to distinguish and collect cells that differentially activated the adaptive  
208 response after MMS exposure. We used a plasmid-based P<sub>ada</sub>-GFP reporter for the adaptive response  
209 that allowed us to identify two main subpopulations of cells after MMS treatment (**Supp.4**). One  
210 fluorescing, reflecting cells activating the response rapidly after MMS addition (ON) and one remaining  
211 non-fluorescent, reflecting cells with a delayed adaptive response (OFF) (**Supp.4**). We then sorted an  
212 identical number of 10<sup>6</sup> cells from the two subpopulations and measured their respective mutation  
213 frequencies based on the number of colonies resistant to the antibiotic rifampicin (**Fig.5 A**). We found  
214 that the mutation frequency was significantly higher for the OFF than the ON subpopulations after 90  
215 min of treatment with 1 mM (~ 1.5-fold difference), 3 mM (~ 5-fold difference) and 10 mM MMS (~4-  
216 fold difference) (**Fig.5 A**). Therefore, cell-to-cell variation in the timing of the adaptive response indeed  
217 causes substantial differences in genomic mutation rates. These results also confirm that the detection  
218 of MutL-mYPet foci as markers for DNA mismatches reports on the genomic mutation rates of single  
219 cells [10,39].

220

#### 221 Superior evolvability of the OFF subpopulation compared to $\Delta$ ada-alkB cells at high stress levels

222

223 To confirm that the P<sub>ada</sub>-GFP reporter activation was dependent on Ada, we also performed FACS with  
224  $\Delta$ ada-alkB cells. As expected, P<sub>ada</sub>-GFP remained inactivated independently of the MMS concentration  
225 (**Supp.4**). Furthermore, the mutation frequency of  $\Delta$ ada-alkB cells was similar to that of the OFF  
226 subpopulation at 1 mM or 3 mM MMS. Therefore, wild-type cells that fail to activate the Ada response  
227 because of gene expression noise suffer the same mutagenic effects of alkylating stress as cells that  
228 lack the *ada* operon completely. However,  $\Delta$ ada-alkB cells differed strongly from the OFF  
229 subpopulation at the higher dose of 10mM MMS (**Fig.5 A**). We did not detect any rifampicin-resistant  
230 colonies for the  $\Delta$ ada-alkB strain after 10mM MMS treatment, whereas the OFF subpopulation  
231 generated a significant number of such colonies (**Fig.5 A**). We attribute the lack of mutant colonies to  
232 the extremely low survival of  $\Delta$ ada-alkB cells in the presence of MMS. Thus, although  $\Delta$ ada-alkB  
233 deletion promotes alkylation-induced mutagenesis (**Fig.4 B**), it also rapidly increases the likelihood of  
234 cell death (**Fig.4 C**). The disproportionate effect of the  $\Delta$ ada-alkB deletion on the population dynamics  
235 therefore diminishes overall evolvability at high stress levels. Although OFF cells initially behave like  
236  $\Delta$ ada-alkB cells, they are capable of activating the Ada response eventually. This enables the repair of  
237 toxic DNA lesions that are otherwise lethal in  $\Delta$ ada-alkB cells. The OFF subpopulation therefore  
238 accumulates mutations during the adaption delay but maintains chances of survival after response  
239 activation. These features make the OFF subpopulation a pool of increased genetic diversity.

240

#### 241 Evolvability as a trade-off between mutability and survival

242

243 We finally sought to address whether the OFF subpopulation contributes significantly to the  
244 evolvability of the whole population. This depends on several characteristics of the subpopulation,  
245 namely its size, mutation rate, and viability. By quantifying the number of rifampicin-resistant colonies  
246 relative to the abundances of the subpopulations, we found that the OFF subpopulation generates a  
247 substantial fraction of all viable mutants despite its small size (**Fig.5 B**). This analysis also demonstrated  
248 that evolvability is a trade-off between mutability and survival. The ON and OFF subpopulations both  
249 have a basal DNA damage tolerance owing to constitutively expressed DNA repair pathways and the  
250 SOS response. Increasing stress leads to higher mutation rates, but the lack of inducible DNA repair  
251 capacity in the OFF subpopulation means that cell survival drops disproportionately as the damage  
252 level rises. Because of this, the evolutionary benefit of the OFF subpopulation is maximal at  
253 intermediate damage level (3 mM MMS), where the subpopulation of 15% of cells generates 53% of  
254 the total rifampicin-resistant mutants.

255

## 256 Discussion

257 Because emergence of mutations in a cell population is driven by rare and stochastic molecular events,  
258 mechanisms governing this process can be lost in the averaged result commonly gained with bulk  
259 experiments. We thus used a single-cell approach to study how regulatory dynamics of DNA repair  
260 genes influence mutation and cell survival, and ultimately impact evolvability of a cell population.  
261 Focusing on the adaptive response to DNA alkylation stress in *E. coli*, we found that, with the  
262 exception of AidB, the whole adaptive response regulon (i.e. Ada, AlkB, AlkA) is heterogeneously  
263 activated across isogenic cells during alkylating stress. Rather than a noisy genetic system, whereby  
264 gene expression heterogeneity is a side-effect of inaccurate control, the regulation of the adaptive  
265 response is orchestrated by a precise master regulator that divides an isogenic cell population into  
266 two defined subpopulations with distinct gene expression states. Interestingly, Ada levels are  
267 upregulated thousandfold in response to alkylation damage, yet cells expressing the non-functional  
268 Ada<sup>C321A</sup> mutant that is defective in O<sup>6</sup>meG lesion repair are not sensitised to alkylation damage and  
269 exhibit only slightly increased mismatch rates. The benefit of high Ada numbers could be an increased  
270 robustness to gene expression noise after response activation. Indeed, we found that fluctuations in  
271 Ada expression are accurately propagated to AlkA. Conversely, the expression of all adaptive response  
272 genes is very low before the response induction. The low basal level of Ada combined with positive  
273 feedback amplification in the presence of alkylation stress creates a stochastic switch where the  
274 infrequent expression of a single Ada molecule is the trigger that turns cells from the OFF to the ON  
275 state. The very low basal abundance of AlkA and AlkB was unexpected in light of their delayed  
276 induction and importance for cell survival. This reinforced the view that a lack of DNA alkylation repair  
277 capacity in a subpopulation of cells serves a particular purpose that provides a greater benefit than its  
278 cost to instantaneous cell fitness.

279 We show that heterogeneity in the adaptive response represents the phenomenon of stress-induced  
280 mutagenesis, whereby cells poorly adapted to their environment increase their mutation rates.  
281 Whether this is an evolvability strategy *per se* or an unavoidable consequence of the selection for  
282 survival has been brought into question [17,52]. Nonetheless, the functional benefit of stress-induced  
283 mutagenesis relies on the ability of cells to propagate any mutations that are generated during stress.  
284 Indeed, alternative DNA repair and damage tolerance mechanisms, such as constitutively-expressed  
285 DNA glycosylases and the translesion synthesis DNA polymerases of the SOS response can rescue early  
286 failures to repair toxic alkylation lesions [39]. However, when replication-stalling lesions saturate  
287 alternative repair strategies, the adaptive response becomes necessary for survival [39]. Our study  
288 demonstrated that cells with a delayed adaptive response have an elevated rate of nascent mutations  
289 and maintain the capacity to propagate these mutations if they eventually activate the adaptive  
290 response. In this way, the transient hypermutable subpopulation generated by stochastic regulation  
291 of DNA alkylation repair increases the evolvability of the whole population.

292

## 293 Acknowledgments

294 The authors thank members of the Uphoff group and the group of David Sherratt for insightful  
295 discussions. M.S.V would like to thank Nicolas Flaugnatti, Pierre Santucci and Yassine Cherrak for their  
296 helpful comments on this work. Research in the Uphoff laboratory is funded by a Sir Henry Dale  
297 fellowship (206159/Z/17/Z) and a Wellcome-Beit prize (206159/Z/17/B) by the Wellcome Trust, and a  
298 Research Prize Fellowship of the Lister Institute of Preventative Medicine. S.U. holds a Hugh Price  
299 Fellowship at Jesus College, Oxford. M.S.V. is funded by a Human Frontiers Science Programme long-  
300 term fellowship (LT000092/2019-L) and holds an EMBO non-stipendiary long-term fellowship (ALTF  
301 1035-2018).

## 302 Orcid

303 M.S.V: 0000-0001-8431-7504

304 S.U: 0000-0002-3579-0888

## 305 References

- 306 1. Pribis JP, García-Villada L, Zhai Y, Lewin-Epstein O, Wang AZ, Liu J, et al. Gamblers: An Antibiotic-  
307 Induced Evolvable Cell Subpopulation Differentiated by Reactive-Oxygen-Induced General Stress  
308 Response. *Mol Cell*. 2019;74: 785-800.e7. doi:10.1016/j.molcel.2019.02.037
- 309 2. Meouche IE, Dunlop MJ. Heterogeneity in efflux pump expression predisposes antibiotic-  
310 resistant cells to mutation. *Science*. 2018;362: 686–690. doi:10.1126/science.aar7981
- 311 3. Vincent MS, Uphoff S. Bacterial phenotypic heterogeneity in DNA repair and mutagenesis.  
312 *Biochem Soc Trans*. [cited 23 Mar 2020]. doi:10.1042/BST20190364
- 313 4. Didelot X, Walker AS, Peto TE, Crook DW, Wilson DJ. Within-host evolution of bacterial  
314 pathogens. *Nature Reviews Microbiology*. 2016;14: 150–162. doi:10.1038/nrmicro.2015.13
- 315 5. Friedberg EC, Walker GC, Siede W, Wood RD. DNA Repair and Mutagenesis. American Society  
316 for Microbiology Press; 2005.
- 317 6. Good BH, McDonald MJ, Barrick JE, Lenski RE, Desai MM. The dynamics of molecular evolution  
318 over 60,000 generations. *Nature*. 2017;551: 45–50. doi:10.1038/nature24287
- 319 7. Baym M, Lieberman TD, Kelsic ED, Chait R, Gross R, Yelin I, et al. Spatiotemporal microbial  
320 evolution on antibiotic landscapes. *Science*. 2016;353: 1147–1151. doi:10.1126/science.aag0822
- 321 8. Matic I, Radman M, Taddei F, Picard B, Doit C, Bingen E, et al. Highly Variable Mutation Rates in  
322 Commensal and Pathogenic *Escherichia coli*. *Science*. 1997;277: 1833–1834.  
323 doi:10.1126/science.277.5333.1833
- 324 9. Oliver A, Cantón R, Campo P, Baquero F, Blázquez J. High Frequency of Hypermutable  
325 *Pseudomonas aeruginosa* in Cystic Fibrosis Lung Infection. *Science*. 2000;288: 1251–1253.  
326 doi:10.1126/science.288.5469.1251
- 327 10. Robert L, Ollion J, Robert J, Song X, Matic I, Elez M. Mutation dynamics and fitness effects  
328 followed in single cells. *Science*. 2018;359: 1283–1286. doi:10.1126/science.aan0797
- 329 11. McCool JD, Long E, Petrosino JF, Sandler HA, Rosenberg SM, Sandler SJ. Measurement of SOS  
330 expression in individual *Escherichia coli* K-12 cells using fluorescence microscopy. *Mol Microbiol*.  
331 2004;53: 1343–1357. doi:10.1111/j.1365-2958.2004.04225.x

- 332 12. Kamenšek S, Podlesek Z, Gillor O, Zgur-Bertok D. Genes regulated by the Escherichia coli SOS  
333 repressor LexA exhibit heterogeneous expression. *BMC Microbiol.* 2010;10: 283.  
334 doi:10.1186/1471-2180-10-283
- 335 13. Jones EC, Uphoff S. Imaging LexA degradation in cells explains regulatory mechanisms and  
336 heterogeneity of the SOS response. *bioRxiv.* 2020; 2020.07.07.191791.  
337 doi:10.1101/2020.07.07.191791
- 338 14. Uphoff S, Lord ND, Okumus B, Potvin-Trottier L, Sherratt DJ, Paulsson J. Stochastic activation of a  
339 DNA damage response causes cell-to-cell mutation rate variation. *Science.* 2016;351: 1094–  
340 1097. doi:10.1126/science.aac9786
- 341 15. Ram Y, Hadany L. Stress-induced mutagenesis and complex adaptation. *Proceedings of the Royal*  
342 *Society B: Biological Sciences.* 2014;281: 20141025. doi:10.1098/rspb.2014.1025
- 343 16. Fitzgerald DM, Hastings PJ, Rosenberg SM. Stress-Induced Mutagenesis: Implications in Cancer  
344 and Drug Resistance. *Annual Review of Cancer Biology.* 2017;1: 119–140. doi:10.1146/annurev-  
345 cancerbio-050216-121919
- 346 17. Frenoy A, Bonhoeffer S. Death and population dynamics affect mutation rate estimates and  
347 evolvability under stress in bacteria. *PLOS Biology.* 2018;16: e2005056.  
348 doi:10.1371/journal.pbio.2005056
- 349 18. Mielecki D, Wrzesiński M, Grzesiuk E. Inducible repair of alkylated DNA in microorganisms.  
350 *Mutation Research/Reviews in Mutation Research.* 2015;763: 294–305.  
351 doi:10.1016/j.mrrev.2014.12.001
- 352 19. Taverna P, Sedgwick B. Generation of an endogenous DNA-methylating agent by nitrosation in  
353 Escherichia coli. *Journal of Bacteriology.* 1996;178: 5105–5111. doi:10.1128/jb.178.17.5105-  
354 5111.1996
- 355 20. Xiao W, Samson L. In vivo evidence for endogenous DNA alkylation damage as a source of  
356 spontaneous mutation in eukaryotic cells. *PNAS.* 1993;90: 2117–2121.  
357 doi:10.1073/pnas.90.6.2117
- 358 21. Fritsch C, Gout J-F, Haroon S, Towheed A, Chung C, LaGosh J, et al. Genome-wide surveillance of  
359 transcription errors in response to genotoxic stress. *PNAS.* 2021;118.  
360 doi:10.1073/pnas.2004077118
- 361 22. Saini N, Sterling JF, Sakofsky CJ, Giacobone CK, Klimczak LJ, Burkholder AB, et al. Mutation  
362 signatures specific to DNA alkylating agents in yeast and cancers. *Nucleic Acids Res.* 2020;48:  
363 3692–3707. doi:10.1093/nar/gkaa150
- 364 23. Aas PA, Otterlei M, Falnes PO, Vågbø CB, Skorpen F, Akbari M, et al. Human and bacterial  
365 oxidative demethylases repair alkylation damage in both RNA and DNA. *Nature.* 2003;421: 859–  
366 863. doi:10.1038/nature01363
- 367 24. Thomas EN, Kim KQ, McHugh EP, Marcinkiewicz T, Zaher HS. Alkylative damage of mRNA leads  
368 to ribosome stalling and rescue by trans translation in bacteria. Dever TE, Storz G, editors. *eLife.*  
369 2020;9: e61984. doi:10.7554/eLife.61984



- 370 25. Wyatt MD, Allan JM, Lau AY, Ellenberger TE, Samson LD. 3-methyladenine DNA glycosylases:  
371 structure, function, and biological importance. *BioEssays*. 1999;21: 668–676.  
372 doi:[https://doi.org/10.1002/\(SICI\)1521-1878\(199908\)21:8<668::AID-BIES6>3.0.CO;2-D](https://doi.org/10.1002/(SICI)1521-1878(199908)21:8<668::AID-BIES6>3.0.CO;2-D)
- 373 26. Kaasen I, Evensen G, Seeberg E. Amplified expression of the tag+ and alkA+ genes in *Escherichia*  
374 *coli*: identification of gene products and effects on alkylation resistance. *J Bacteriol*. 1986;168:  
375 642–647. doi:10.1128/jb.168.2.642-647.1986
- 376 27. Wilkinson MC, Potter PM, Cawkwell L, Georgiadis P, Patel D, Swann PF, et al. Purification of the  
377 *E. coli* ogt gene product to homogeneity and its rate of action on O6-methylguanine, O6-  
378 ethylguanine and O4-methylthymine in dodecadeoxyribonucleotides. *Nucleic Acids Res*.  
379 1989;17: 8475–8484. doi:10.1093/nar/17.21.8475
- 380 28. Seeberg E, Eide L, Bjørås M. The base excision repair pathway. *Trends in Biochemical Sciences*.  
381 1995;20: 391–397. doi:10.1016/S0968-0004(00)89086-6
- 382 29. Moore MH, Gulbis JM, Dodson EJ, Demple B, Moody PC. Crystal structure of a suicidal DNA  
383 repair protein: the Ada O6-methylguanine-DNA methyltransferase from *E. coli*. *EMBO J*.  
384 1994;13: 1495–1501.
- 385 30. He C, Hus J-C, Sun LJ, Zhou P, Norman DPG, Dötsch V, et al. A Methylation-Dependent  
386 Electrostatic Switch Controls DNA Repair and Transcriptional Activation by *E. coli* Ada. *Molecular*  
387 *Cell*. 2005;20: 117–129. doi:10.1016/j.molcel.2005.08.013
- 388 31. Yang C-G, Yi C, Duguid EM, Sullivan CT, Jian X, Rice PA, et al. Crystal structures of DNA/RNA  
389 repair enzymes AlkB and ABH2 bound to dsDNA. *Nature*. 2008;452: 961–965.  
390 doi:10.1038/nature06889
- 391 32. Yu B, Edstrom WC, Benach J, Hamuro Y, Weber PC, Gibney BR, et al. Crystal structures of  
392 catalytic complexes of the oxidative DNA/RNA repair enzyme AlkB. *Nature*. 2006;439: 879–884.  
393 doi:10.1038/nature04561
- 394 33. Bowles T, Metz AH, O’Quin J, Wawrzak Z, Eichman BF. Structure and DNA binding of alkylation  
395 response protein AidB. *Proc Natl Acad Sci USA*. 2008;105: 15299–15304.  
396 doi:10.1073/pnas.0806521105
- 397 34. Bowman BR, Lee S, Wang S, Verdine GL. Structure of the *E. coli* DNA Glycosylase AlkA Bound to  
398 the Ends of Duplex DNA: A System for the Structure Determination of Lesion-Containing DNA.  
399 *Structure*. 2008;16: 1166–1174. doi:10.1016/j.str.2008.04.012
- 400 35. Sedgwick B. Repairing DNA-methylation damage. *Nat Rev Mol Cell Biol*. 2004;5: 148–157.  
401 doi:10.1038/nrm1312
- 402 36. Landini P, Volkert MR. Regulatory Responses of the Adaptive Response to Alkylation Damage: a  
403 Simple Regulon with Complex Regulatory Features. *J Bacteriol*. 2000;182: 6543–6549.
- 404 37. Uphoff S, Lord ND, Okumus B, Potvin-Trottier L, Sherratt DJ, Paulsson J. Stochastic activation of a  
405 DNA damage response causes cell-to-cell mutation rate variation. *Science*. 2016;351: 1094–  
406 1097. doi:10.1126/science.aac9786
- 407 38. Uphoff S. A Quantitative Model Explains Single-Cell Dynamics of the Adaptive Response in  
408 *Escherichia coli*. *Biophysical Journal*. 2019;0. doi:10.1016/j.bpj.2019.08.009

- 409 39. Uphoff S. Real-time dynamics of mutagenesis reveal the chronology of DNA repair and damage  
410 tolerance responses in single cells. *PNAS*. 2018; 201801101. doi:10.1073/pnas.1801101115
- 411 40. Wang P, Robert L, Pelletier J, Dang WL, Taddei F, Wright A, et al. Robust growth of *Escherichia*  
412 *coli*. *Curr Biol*. 2010;20: 1099–1103. doi:10.1016/j.cub.2010.04.045
- 413 41. Hamill MJ, Jost M, Wong C, Bene NC, Drennan CL, Elliott SJ. Electrochemical Characterization of  
414 *Escherichia coli* Adaptive Response Protein AidB. *International Journal of Molecular Sciences*.  
415 2012;13: 16899–16915. doi:10.3390/ijms131216899
- 416 42. Booth JA, Thomassen GO, Rowe AD, Weel-Sneve R, Lagesen K, Kristiansen KI, et al. Tiling array  
417 study of MNNG treated *Escherichia coli* reveals a widespread transcriptional response. *Sci Rep*.  
418 2013;3: 3053–3053. doi:10.1038/srep03053
- 419 43. Nakabeppu Y, Sekiguchi M. Regulatory mechanisms for induction of synthesis of repair enzymes  
420 in response to alkylating agents: ada protein acts as a transcriptional regulator. *Proc Natl Acad*  
421 *Sci U S A*. 1986;83: 6297–6301.
- 422 44. Landini P, Gaal T, Ross W, Volkert MR. The RNA Polymerase  $\alpha$  Subunit Carboxyl-terminal Domain  
423 Is Required for Both Basal and Activated Transcription from the *alkA* Promoter\*. *Journal of*  
424 *Biological Chemistry*. 1997;272: 15914–15919. doi:10.1074/jbc.272.25.15914
- 425 45. Okumus B, Landgraf D, Lai GC, Bakshi S, Arias-Castro JC, Yildiz S, et al. Mechanical slowing-down  
426 of cytoplasmic diffusion allows in vivo counting of proteins in individual cells. *Nat Commun*.  
427 2016;7: 1–11. doi:10.1038/ncomms11641
- 428 46. Payne JL, Wagner A. The causes of evolvability and their evolution. *Nature Reviews Genetics*.  
429 2019;20: 24–38. doi:10.1038/s41576-018-0069-z
- 430 47. Takano K, Nakabeppu Y, Sekiguchi M. Functional sites of the Ada regulatory protein of  
431 *Escherichia coli*: Analysis by amino acid substitutions. *Journal of Molecular Biology*. 1988;201:  
432 261–271. doi:10.1016/0022-2836(88)90137-4
- 433 48. Taketomi A, Nakabeppu Y, Ihara K, Hart DJ, Furuichi M, Sekiguchi M. Requirement for two  
434 conserved cysteine residues in the Ada protein of *Escherichia coli* for transactivation of the *ada*  
435 promoter. *Molec Gen Genet*. 1996;250: 523–532. doi:10.1007/BF02174440
- 436 49. Sikora A, Mielecki D, Chojnacka A, Nieminuszczy J, Wrzesiński M, Grzesiuk E. Lethal and  
437 mutagenic properties of MMS-generated DNA lesions in *Escherichia coli* cells deficient in BER  
438 and AlkB-directed DNA repair. *Mutagenesis*. 2010;25: 139–147. doi:10.1093/mutage/geb052
- 439 50. Fu D, Calvo JA, Samson LD. Balancing repair and tolerance of DNA damage caused by alkylating  
440 agents. *Nat Rev Cancer*. 2012;12: 104–120. doi:10.1038/nrc3185
- 441 51. Marinus MG. DNA Mismatch Repair. *EcoSal Plus*. 2012;5. doi:10.1128/ecosalplus.7.2.5
- 442 52. Torres-Barceló C, Kojadinovic M, Moxon R, MacLean RC. The SOS response increases bacterial  
443 fitness, but not evolvability, under a sublethal dose of antibiotic. *Proceedings of the Royal*  
444 *Society B: Biological Sciences*. 2015;282: 20150885. doi:10.1098/rspb.2015.0885
- 445 53. Reyes-Lamothe R, Possoz C, Danilova O, Sherratt DJ. Independent positioning and action of  
446 *Escherichia coli* replisomes in live cells. *Cell*. 2008;133: 90–102. doi:10.1016/j.cell.2008.01.044

- 447 54. Banaz N, Mäkelä J, Uphoff S. Choosing the right label for single-molecule tracking in live  
448 bacteria: side-by-side comparison of photoactivatable fluorescent protein and Halo tag dyes. J  
449 Phys D: Appl Phys. 2018;52: 064002. doi:10.1088/1361-6463/aaf255
- 450 55. Datsenko KA, Wanner BL. One-step inactivation of chromosomal genes in *Escherichia coli* K-12  
451 using PCR products. PNAS. 2000;97: 6640–6645. doi:10.1073/pnas.120163297
- 452 56. Schneider CA, Rasband WS, Eliceiri KW. NIH Image to ImageJ: 25 years of image analysis. Nature  
453 Methods. 2012;9: 671–675. doi:10.1038/nmeth.2089
- 454 57. Holden SJ, Uphoff S, Hohlbein J, Yadin D, Le Reste L, Britton OJ, et al. Defining the limits of  
455 single-molecule FRET resolution in TIRF microscopy. Biophys J. 2010;99: 3102–3111.  
456 doi:10.1016/j.bpj.2010.09.005
- 457 58. Zaslaver A, Bren A, Ronen M, Itzkovitz S, Kikoin I, Shavit S, et al. A comprehensive library of  
458 fluorescent transcriptional reporters for *Escherichia coli*. Nat Methods. 2006;3: 623–628.  
459 doi:10.1038/nmeth895

460

## 461 **Materials and Methods**

### 462 **Construction of strains and plasmids**

463 All strains were derived from *Escherichia coli* K12 AB1157. C-terminal msCFP3, mYPet and HaloTag  
464 fusions were inserted with a flexible 11 amino acids linker (SAGSAAGSGEF) at the endogenous  
465 chromosomal loci by  $\lambda$ -red recombination using plasmids pSU003 [37], pRod50 [53] and pSU005 [54].  
466 The  $\lambda$ -red insertions are flanked by Flp site-specific recombination sites (frt) that allow removing the  
467 antibiotic resistance gene using Flp recombinase from plasmid pCP20[55]. After recombination, all  $\lambda$ -  
468 red insertions were confirmed by colony PCR and the alleles were moved into new strains by P1 phage  
469 transduction. The dual reporter strains carrying the  $P_{ada}$ -CFP reporter has been described in [37]. It is  
470 a transcriptional fusion made of a single copy of the *ada* promoter followed by the CFP fast-maturing  
471 variant SCFP3A inserted at the chromosomal *intS* site (~150 kb downstream from the native *ada* gene).  
472 The  $\Delta alkB$  deletion strain was obtained from the Coli Genetics Stock Center (CGSC 9779) and moved  
473 into other strains by P1 phage transduction. The  $\Delta alkA$  and  $\Delta ada-alkB$  mutants were engineered by  $\lambda$ -  
474 red recombination. The chromosomal *ada*<sup>C321A</sup> point mutant has been engineered by  $\lambda$ -red  
475 recombination using plasmid pMV010. This plasmid is derived from plasmid pMV001 that has been  
476 synthesized with GeneArt Gene Synthesis (ThermoFisher Scientific). pMV001 carries the  $P_{ada}$ -*ada-alkB*  
477 operon where codons encoding Ada C38 and C321 have been replaced to encode A38 and A321.  
478 pMV010 underwent site-directed mutagenesis (NEBaseChanger) to restore the original codon  
479 encoding C38. An additional chloramphenicol resistance cassette was inserted downstream *alkB* into  
480 pMV010 to select for recombinant cells after  $\lambda$ -red recombination into  $\Delta ada-alkB$ .

### 481 **Cell culture**

482 Strains were streaked from frozen glycerol stocks onto LB agarose with appropriate antibiotic  
483 selection. A single colony was used to inoculate LB and grown for 6-7 hours. The cultures were then  
484 diluted 1:1000 into supplemented M9 minimal medium containing M9 salts (15 g/L KH<sub>2</sub>PO<sub>4</sub>, 64 g/L  
485 Na<sub>2</sub>HPO<sub>4</sub>, 2.5 g/L NaCl, 5.0 g/L NH<sub>4</sub>Cl), 2 mM MgSO<sub>4</sub>, 0.1 mM CaCl<sub>2</sub>, 0.5  $\mu$ g/ml thiamine, MEM amino  
486 acids, 0.1 mg/ml L-proline, 0.2% glucose. Cultures were grown overnight to stationary phase, then  
487 diluted 1:50 into supplemented M9 medium and grown to OD<sub>600</sub>= 0.2.

## 488 **Single-molecule counting microscopy**

489 Cells were treated as described in the cell culture section until OD600 = 0.2 and resuspended into 100  
490  $\mu$ l of supplemented M9 minimal medium. Cells expressing HaloTag fusions were labelled with TMR  
491 ligand (Promega) following the procedure previously described in [54]. Briefly, 5  $\mu$ l of 2.5  $\mu$ M TMR  
492 ligand was added to the cell resuspension and incubated for 30 min at 25°C. TMR dyes were then  
493 removed with four rounds of washing. Cells were resuspended into 1 ml of supplemented M9 minimal  
494 medium and incubated at 37°C for 30 minutes. In order to stop protein diffusion, cells were pelleted  
495 and resuspended into 2.5% paraformaldehyde in PBS buffer and fixed for 30 min at room temperature.  
496 Fixed cells were centrifuged, concentrated 10-fold and 1  $\mu$ l of the cell resuspension was spotted on an  
497 agarose pad. Single-molecule imaging was performed using a custom-built total internal reflection  
498 fluorescence (TIRF) microscope under oblique illumination at room temperature. Epifluorescence  
499 illumination was used to ensure that Halo-tagged proteins were detected within the whole cell. To  
500 reduce both background noise and the probability of missed detection due to TMR stochastic blinking  
501 we used exposure time of 1 sec and acquired 5 frames per sample under continuous 561 nm excitation  
502 at 0.2 kW.cm<sup>-2</sup>. TMR-labelled Halo-tagged proteins are initially in the fluorescent state [54], hence to  
503 avoid loss of detection of fast bleaching TMR we set up our camera with TTL mode, such that the first  
504 frame acquired contains all fluorescent molecules. The 5 frames were then averaged in a single image  
505 using the Z-projection function of ImageJ [56] (Projection type: averaged intensity) and fluorescent  
506 spots were counted manually.

## 507 **Single-cell microfluidic-based microscopy**

508 Cells were treated as described in the cell culture section until OD600 = 0.2. 0.85 mg/mL of surfactant  
509 pluronic F127 (Sigma Aldrich) was added to the culture to avoid cell aggregation in the microfluidic  
510 device. The microfluidic single-cell imaging device was previously designed and experiments were  
511 performed as described in [39]. In addition to fluorescent reporters of the adaptive response, strains  
512 used for single-cell measurement constitutively expressed the fluorescent protein mKate2 and carried  
513 an *flhD* gene deletion to remove flagellum motility. Imaging was performed on a Nikon Ti Eclipse  
514 inverted fluorescence microscope equipped with perfect focus system, 100x NA1.45 oil immersion  
515 objective, sCMOS camera (Hamamatsu Orca Flash 4), motorized stage, and 37°C temperature chamber  
516 (Okolabs). Fluorescence images were automatically collected using NIS-Elements software (Nikon) and  
517 an LED excitation source (Lumencor SpectraX). Time-lapse movies were recorded at 3-min intervals  
518 with exposures time of 75ms for mCFP3, 100ms for mKate2 and 300ms for mYPet, using 50% LED  
519 excitation intensities.

## 520 **Data analysis**

521 Microscopy movies were analyzed using custom MATLAB software to segment cells based on  
522 cytoplasmic mKate2 fluorescence. Only mother cells at the end of each channel were included in the  
523 analysis. Cell deaths were manually detected when growth ceased, or when time traces terminated  
524 abruptly because cell filamentation led to the disappearance of the cell from the growth channel.  
525 mYPet and CFP reporters intensities were calculated from the average pixel intensities inside the  
526 segmented cell area and subtracting the background signal outside of cells. Detection of MutL-mYPet  
527 foci for mismatch rate determination was performed with a spot-finding algorithm [57]. When foci  
528 persisted for several frames, only the first frame was counted as a mismatch event. Mismatch rates  
529 were calculated by dividing the number of observed mismatch events by the observation time interval.  
530 Cell-average time traces of mismatch rates were generated by dividing the number of mismatch  
531 events by the number of observed cells in each frame. Pearson correlation coefficients were calculated  
532 using the MATLAB `corrcoef` function. Cross-correlations between fluorescence signals were calculated  
533 using the MATLAB `xcorr` function.

## 534 FACS and rifampicin assays

535 4ml of M9 supplemented with kanamycin (25ug/ml) was inoculated with a single colony of WT (SU828)  
536 or  $\Delta$ ada-alkB (SU829). SU828 and SU829 contain a constitutive mKate2 segmentation marker and a  
537 kanamycin resistant plasmid (pUA139) encoding a  $P_{ada}$ -GFP reporter (obtained from the Uri Alon's  
538 reporter library [58]). At OD600 = 0.2, cells were treated with 1mM, 3mM or 10mM MMS for 90 min.  
539 1 ml of cells were then washed two times by centrifugation and resuspended into 1X PBS to remove  
540 residual MMS. Cells were diluted into 5 ml 1X PBS and sorted and analysed with a S3e™ Cell Sorter  
541 and ProSort™ Software (BioRad). Fluorescence intensities of cells were measured using 488 nm and  
542 561 nm lasers. Signals were collected using the emission filters FL1 (525/30 nm) and FL3 (615/25 nm)  
543 for GFP and mKate2, respectively. Voltages of the photomultipliers were 500, 300, 600, and 720 volts  
544 for FSC (forward scatter), SSC (side scatter), FL1, and FL3, respectively. Histograms obtained (Cells  
545 count versus GFP fluorescence) were gated on the population of interest and cells were sorted in 5ml  
546 1X PBS at a rate of 10000 particles per second. Cells were diluted into 10 ml of LB and incubated at  
547 37C for one hour. Cells were centrifuged (4500 rpm for 10 min) and resuspended into 1ml of LB before  
548 being plated on freshly prepared LB agar plates with 20ug/ml rifampicin. After over night incubation  
549 at 37C, the number of rifampicin resistant clones was counted and divided by the number of cells  
550 sorted to define the rifampicin resistance frequency. Measurements were carried out 3 times with  
551 bacteria from different plates.

552

## 553 Figure Legends

554

### 555 Fig.1: Stochastic activation of Ada affects the expression of the adaptive response genes

556 (A) Schematic of the adaptive response regulation. The adaptive response gene network is composed  
557 of the *ada-alkB* operon, *alkA* and *aidB*. Methylation of the damage sensor protein Ada turns itself into  
558 a transcriptional activator the regulon. (B) Ada N-terminal domain (PDB: 1ZGW) and C-terminal  
559 domain (PDB: 1SFE) carry the methylated phosphotriester (MPT) and O<sup>6</sup>meG repair activities  
560 respectively. The methyl acceptors C38 and C321 are shown in orange. (C-F) Microfluidic-based  
561 imaging of the adaptive response components activation. Single-cell time-traces of Ada-mYPet (cells  
562 = 104) (C), AlkB-mYPet (cells = 265) (D), AlkA-mYPet (cells = 228) (E) and AidB-mYPet (cells = 146) (F)  
563 upon 1 mM MMS treatment (shaded background). Example of cells delaying gene expression are  
564 shown in red. Colored curves represent cell average time trace.

565

### 566 Fig.2: Fluctuations in *ada* expression are propagated to *alkA*

567 Dual reporter assays of Ada-CFP and AlkA-mYPet expressions. (A) Example of microfluidic single-cell  
568 imaging of the dual reporter strain carrying the Ada-CFP and AlkA-mYPet reporters with constant 1  
569 mM MMS treatment. Ada-CFP fluorescence is displayed in blue, AlkA-mYPet is displayed in yellow and  
570 constitutive mKate2 fluorescent cell marker is displayed in red. (B-C) Example of single-cell time traces  
571 showing activation of Ada-CFP (B) and AlkA-mYPet (C) after 1 mM MMS addition (shaded background).  
572 (D) Fluorescence of each single-cell (cells = 239) has been averaged, normalized and subtracted from  
573 their level at time = 0h (addition of MMS in the microfluidic system). Inset shows the original signals  
574 and their standard deviations about the mean (colored regions). (E) Correlation plot showing delay  
575 times between 1 mM MMS addition and response activation for Ada-CFP and AlkA-mYPet. Each circle  
576 represents one cell. R is the Pearson coefficient. The red line shows the best linear fit. (F) Cross-

577 correlations of Ada-CFP and AlkA-mYPet signals between 9 and 11 hours after MMS addition. The  
578 average of each individual cross-correlation between the mYPet and CFP signals from the same cell is  
579 represented by the black curve, whereas the red curve represents the average from two random cells  
580 and indicates that the correlation between Ada and AlkA is specific of their respective cell. The blue  
581 curve represents the average of each individual cross-correlation between the AlkA-mYPet signal and  
582 the segmentation marker mKate2 signal from the same cell and indicates that the correlation is  
583 independent of the fluorescence fluctuations due to cell elongation during the cell cycle.

584

### 585 **Fig.3: Basal level of the adaptive response proteins**

586 The distribution of Ada-Halo (cells= 121), AlkB-Halo (cells= 94), AlkA-Halo (cells= 238) and AidB-Halo  
587 (cells = 105) proteins per cell are shown in panel A, B, C and D respectively.

588

### 589 **Fig.4: Contribution of Ada, AlkB and AlkA to the alkylating stress response**

590 (A) Example of real-time imaging of DNA mismatch emergence. The addition of MMS in the fluidic  
591 system is mutagenic and results in nucleotide misincorporation during DNA replication. The DNA  
592 mismatch is recognised by the MutL-mYPet protein that forms fluorescent foci (yellow dots) and  
593 enables automated mismatch detection (yellow circles). Fluorescence of the segmentation marker  
594 mKate2 is shown in red. (B) Mismatch rate dynamics for strains  $\Delta ada-alkB$  in blue (cells = 435),  $\Delta alkB$   
595 in green (cells = 347),  $\Delta alkA$  in red (cells = 518),  $ada^{C321A}$  in purple (cells = 395), during constant 1 mM  
596 MMS treatment (shaded background) and compared with the WT strain shown in black (cells = 527).  
597 Mismatch rate curves have been smoothed using a moving average of 30 min. (C) Distribution of cell  
598 survival times during constant 1 mM MMS treatment for these same strains.

599

### 600 **Fig.5: Consequences of the adaptive response heterogeneity on the mutation rate**

601 (A) Boxplots showing the number of rifampicin resistant colonies for Ada-ON, Ada-OFF and  $\Delta ada-alkB$   
602 populations after 90 min treatment with different MMS concentrations (shown in mM). Each  
603 population was sorted according to defined sorting gates shown in supplementary.4. Biologically  
604 independent experiments (culture started from a distinct single colony) are grouped by colour. For  
605 each biological replicate, three rounds of sorting have been performed and plated on different  
606 rifampicin plates. P values were obtained with a two-tailed t-test. (B) Bar plot showing the evolvability  
607 ratio of each subpopulation after 90 min treatment with different MMS concentrations. The  
608 evolvability ratio has been defined as the product of the percentage of cells sorted in the total  
609 population and the rifampicin resistant mutant counts arising from this subpopulation. Averaged  
610 percentage of the subpopulation is shown for Ada-OFF and Ada-ON.

611

### 612 **Supp.1: MMS sensitivity assays**

613 To assess the functionality of translational and transcriptional reporters used in this study, we  
614 performed MMS sensitivity tests by spotting 10-fold serial dilutions of over-night cell cultures on LB  
615 and LB + 3mM MMS plates and compared growths after over-night incubation at 37C. Note that the  
616  $P_{ada-cfp}$  reporter refers to an ectopic version of the *ada* promoter, the native  $P_{ada-ada-alkB}$  locus is  
617 unaltered in this strain.

618 **Supp.2: Dual reporter assays of  $P_{ada}$ -CFP and AlkA-mYPet activation upon 1 mM MMS treatment**

619 (A) Fluorescence of each single-cell (cells = 401) has been averaged, normalized and subtracted from  
620 their level at time = 0h (addition of MMS in the fluidic system). Inset shows the original signals and  
621 their standard deviations about the mean (coloured regions). (B) Correlation plot showing delay times  
622 between 1.5 mM MMS addition and response activation for  $P_{ada}$ -CFP and AlkA-mYPet. Each circle  
623 represents one cell. R is the Pearson coefficient. The red line shows the best linear fit. (C) Cross-  
624 correlations of  $P_{ada}$ -CFP and AlkA-mYPet signals between 9 and 11 hours after 1.5 mM MMS addition.  
625 The average of each individual cross-correlation between the mYPet and CFP signals from the same  
626 cell is represented by the black curve, whereas the red curve represents the average from two random  
627 cells and indicates that the correlation between Ada and AlkA is specific of their respective cell. The  
628 blue curve represents the average of each individual cross-correlation between the AlkA-mYPet signal  
629 and the segmentation marker mKate2 signal from the same cell and indicates that the correlation is  
630 independent of the fluorescence fluctuations due to cell elongation during the cell cycle.

631 **Supp.3: Basal level of the adaptive response proteins.**

632 Example of single molecule spots detected within chemically fixed cells after in vivo HaloTag labelling  
633 with TMR ligand. Upper panel = brightfield, lower panel = 561 nm channel (averaged stacks). Scale bar  
634 = 1 $\mu$ m.

635 **Supp.4: Detection and sorting of Ada-ON and Ada-OFF subpopulations**

636 Flow-cytometry was performed on the WT and  $\Delta ada-alkB$  strains, both carrying a plasmid-based  $P_{ada}$ -  
637 GFP reporter and a segmentation marker mKate2. The segmentation marker enables to exclude  
638 debris, dead cells and contaminants from the analysis. In absence of MMS treatment, WT cells exhibit  
639 a unimodal distribution that is used to define the inactivated-population gate (OFF). After 90 min  
640 treatment with 1, 3 or 10 mM MMS, WT cells exhibit a bimodal distribution reflecting the  
641 subpopulation of cells delaying (gate OFF) or activating (gate ON) the adaptive response. The  $\Delta ada$ -  
642  $alkB$  remains inactivated independently of the MMS concentration and allows us to control that the  
643  $P_{ada}$ -GFP reporter is dependent on the Ada production.

644

# Fig. 1

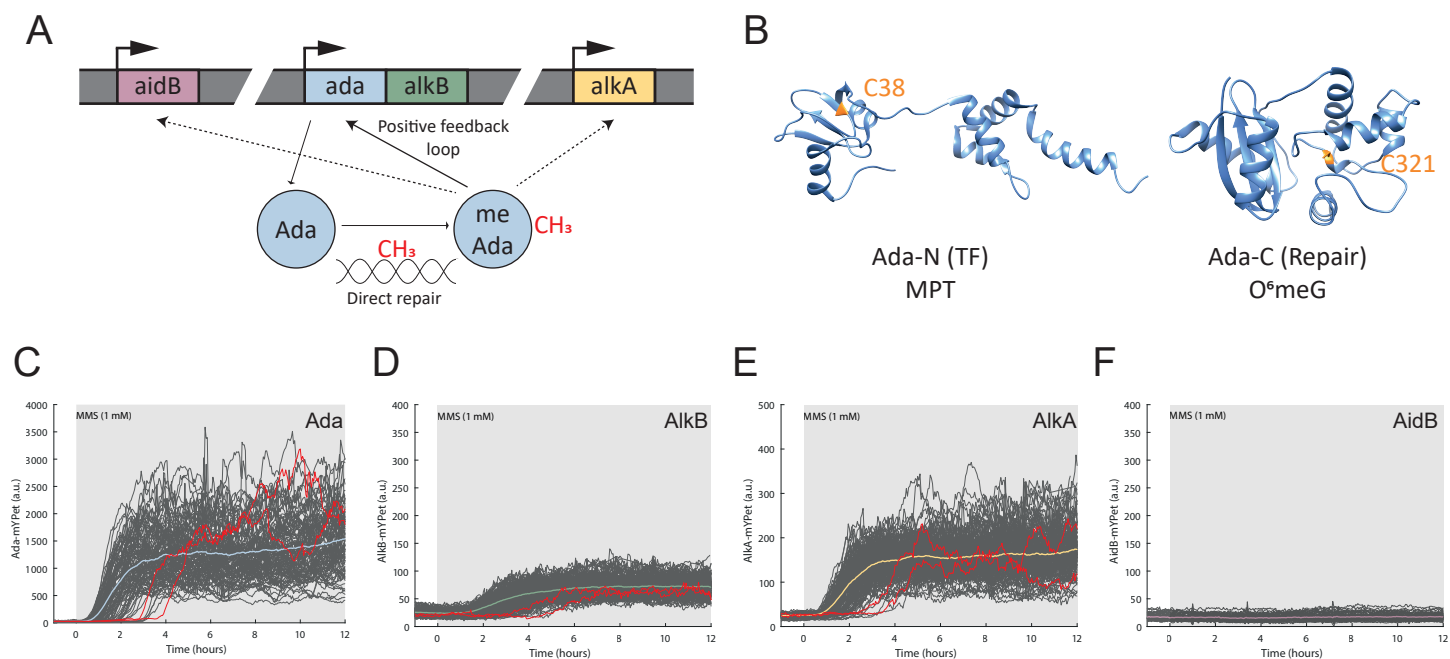



# Fig. 2

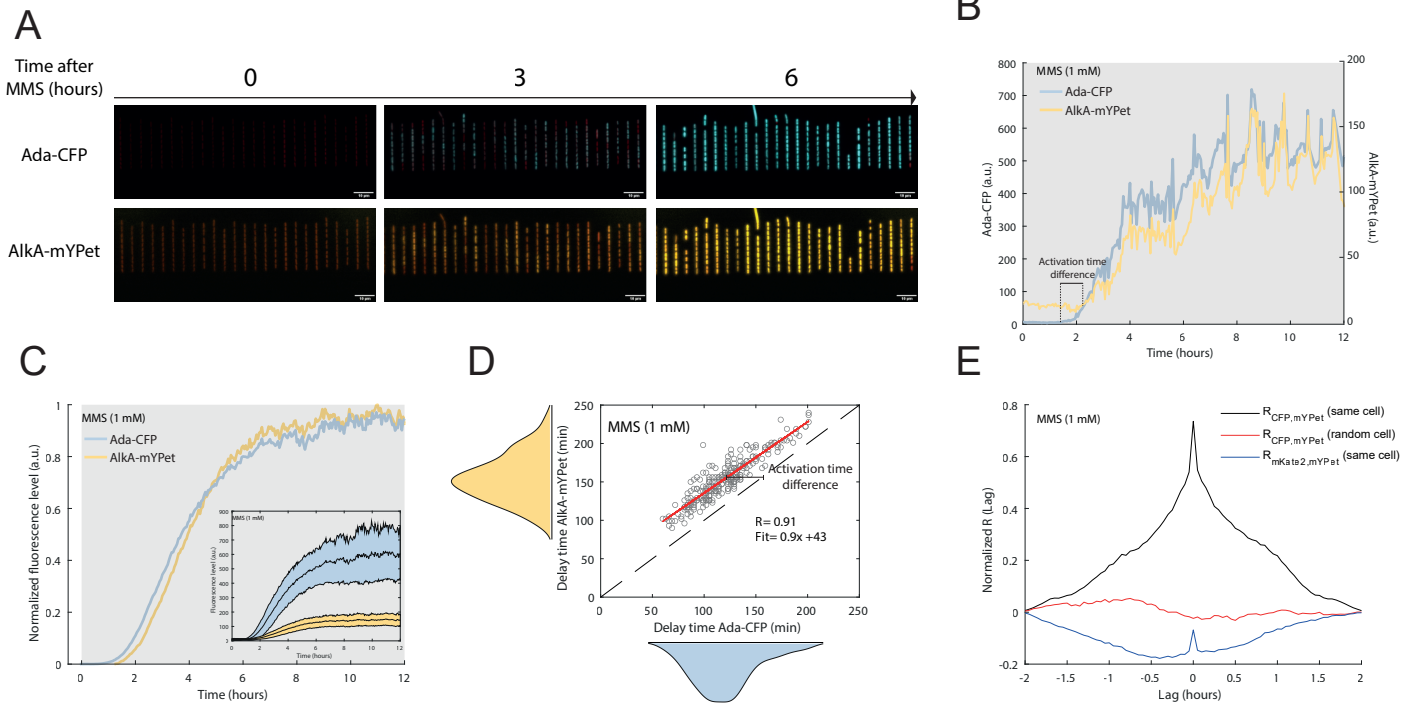

# Fig. 3

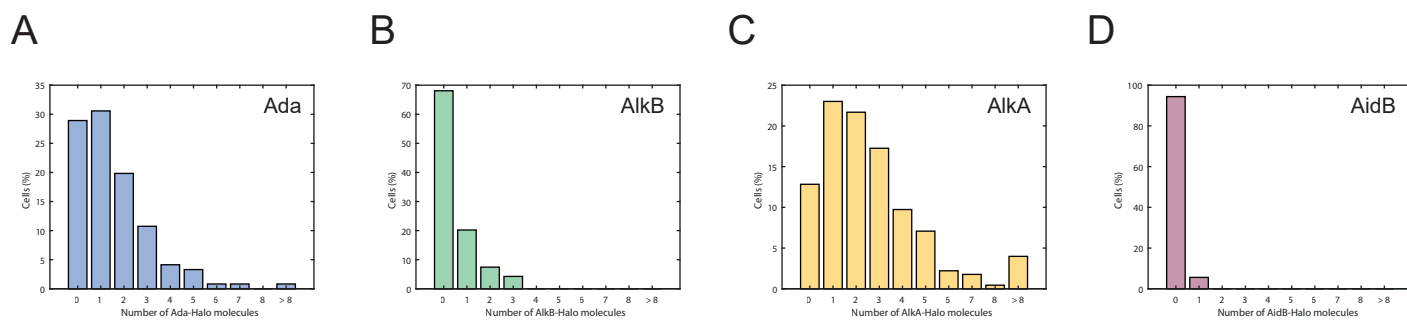

# Fig. 4

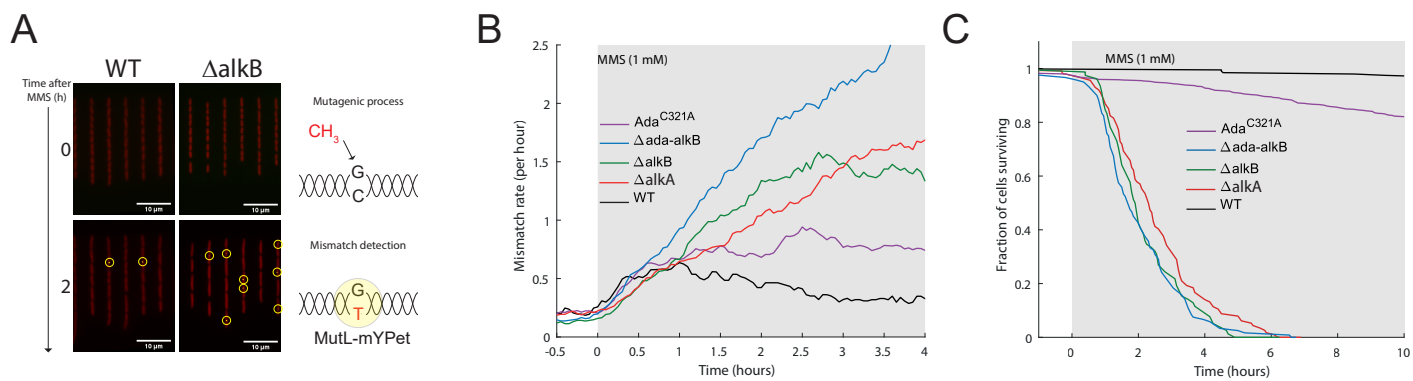

# Fig. 5

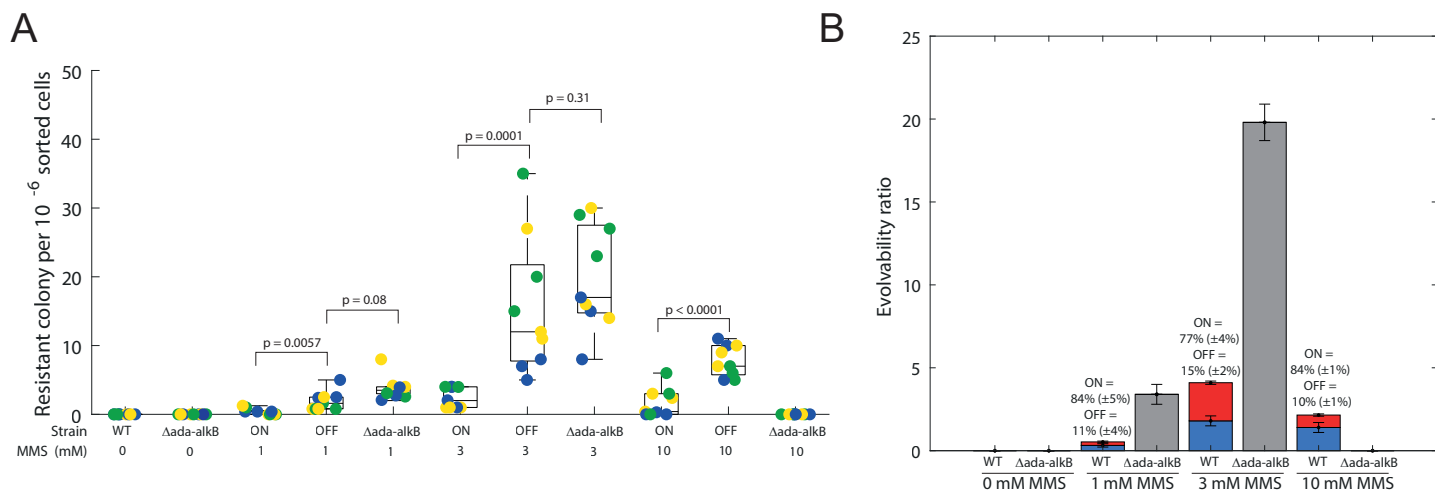

# Supp. 1

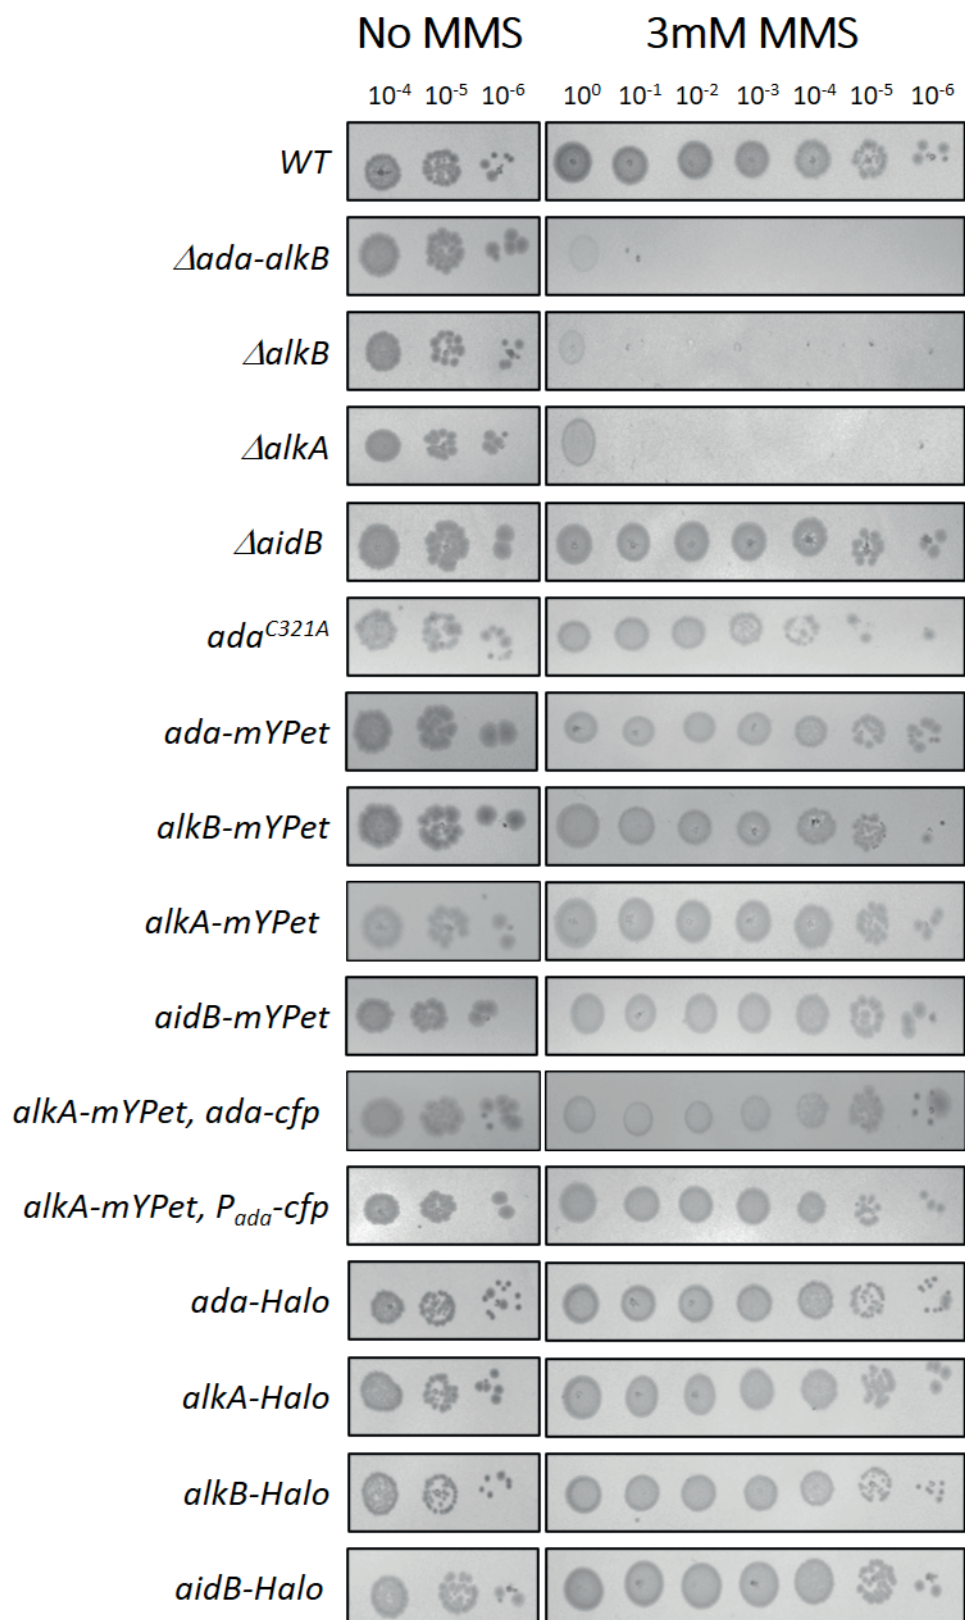

# Supp. 2

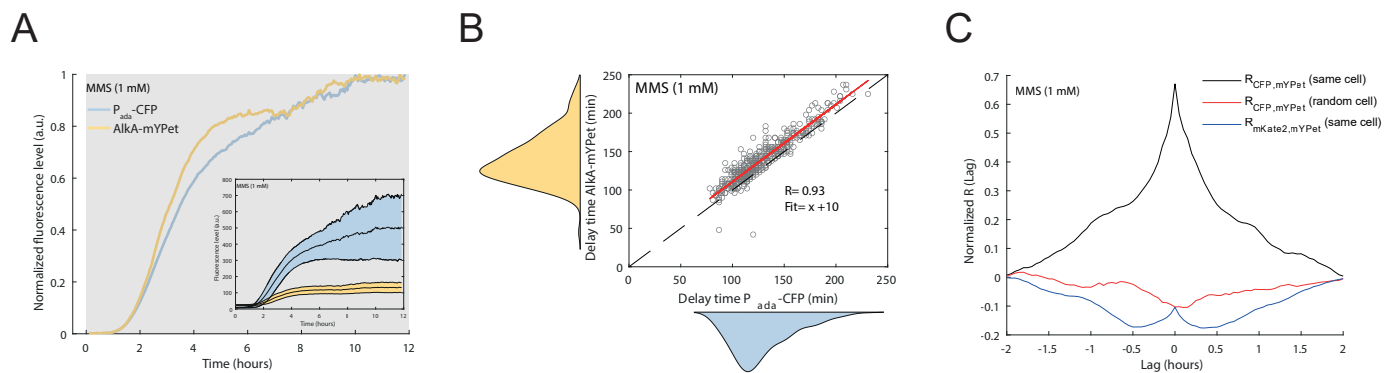

# Supp. 3

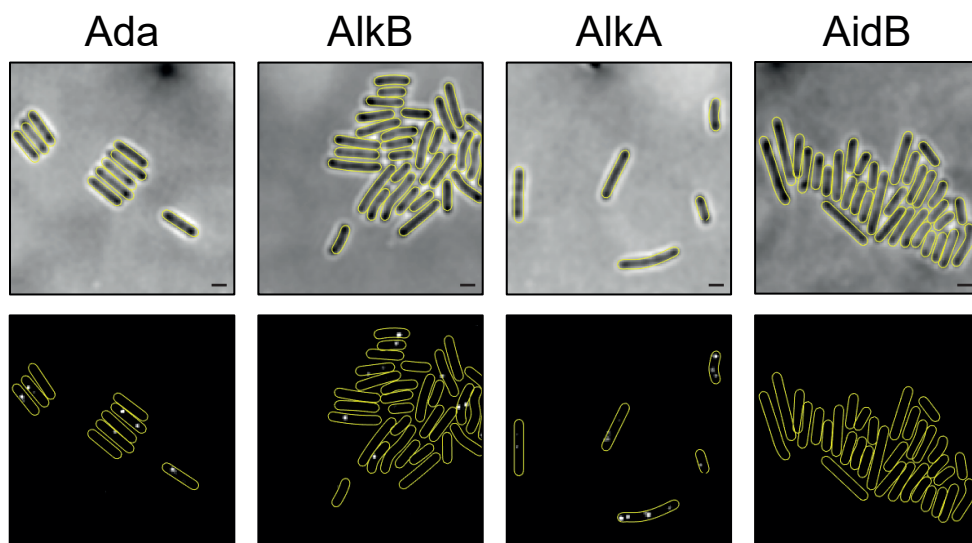

# Supp. 4

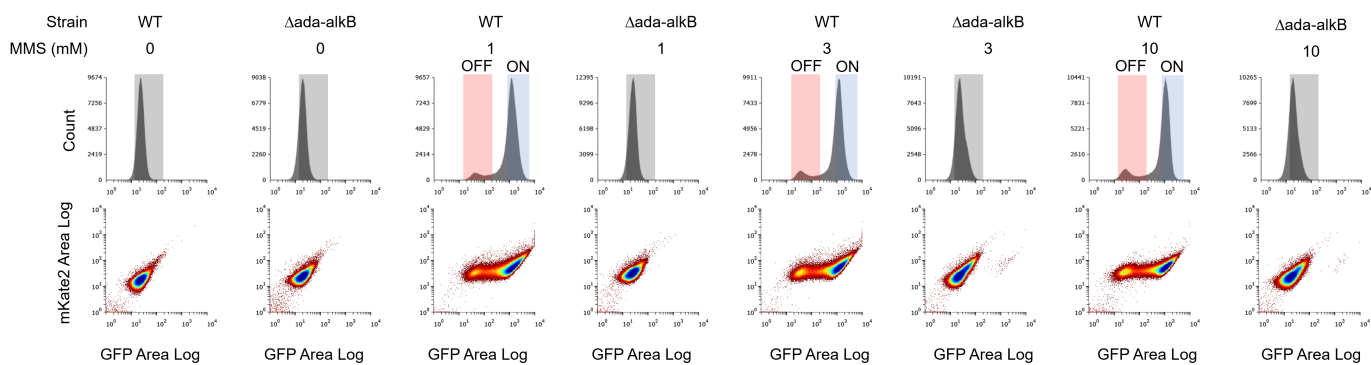



| Genotype                                                                            | Source         | Identifier    |
|-------------------------------------------------------------------------------------|----------------|---------------|
| Escherichia coli K12 AB1157                                                         | Bachmann, 1996 | <b>OX-001</b> |
| AB1157, $\Delta$ flhD, mKate2, MutL-mYPet                                           | Uphoff, 2018   | <b>SU178</b>  |
| AB1157, $\Delta$ ada-alkB::kan                                                      | This study     | <b>SU797</b>  |
| AB1157, $\Delta$ ada-alkB::kan, $\Delta$ flhD, mKate2, MutL-mYPet                   | This study     | <b>SU852</b>  |
| AB1157, $\Delta$ alkB                                                               | This study     | <b>SU733</b>  |
| AB1157, $\Delta$ alkB::kan, $\Delta$ flhD, mKate2, MutL-mYPet                       | This study     | <b>SU775</b>  |
| AB1157, $\Delta$ alkA                                                               | This study     | <b>SU727</b>  |
| AB1157, $\Delta$ alkA::kan, $\Delta$ flhD, mKate2, MutL-mYPet                       | Uphoff, 2018   | <b>SU399</b>  |
| AB1157, ada <sup>C321A</sup> -alkB::cat                                             | This study     | <b>SU858</b>  |
| AB1157, ada <sup>C321A</sup> -alkB::cat, $\Delta$ flhD, mKate2, MutL-mYPet          | This study     | <b>SU902</b>  |
| AB1157, $\Delta$ flhD, mKate2, ada-mYPet::kan                                       | Uphoff, 2016   | <b>SU072</b>  |
| AB1157, $\Delta$ flhD, mKate2, alkB-mYPet::kan                                      | This study     | <b>SU750</b>  |
| AB1157, $\Delta$ flhD, mKate2, alkA-mYPet::kan                                      | This study     | <b>SU749</b>  |
| AB1157, $\Delta$ flhD, P <sub>ada</sub> -msCFP3::kan (inserted at intS)             | Uphoff, 2016   | <b>SU099</b>  |
| AB1157, $\Delta$ flhD, mKate2, ada-CFP::kan, alkA-mYPet                             | This study     | <b>SU936</b>  |
| AB1157, $\Delta$ flhD, P <sub>ada</sub> -msCFP3::kan (inserted at intS), alkA-mYPet | This study     | <b>SU753</b>  |
| AB1157, ada-HaloTag::kan                                                            | This study     | <b>SU651</b>  |
| AB1157, alkA-HaloTag::kan                                                           | This study     | <b>SU650</b>  |
| AB1157, alkB-HaloTag::kan                                                           | This study     | <b>SU647</b>  |
| AB1157, mKate2, pUA139                                                              | This study     | <b>SU828</b>  |
| AB1157, mKate2, $\Delta$ ada-alkB, pUA139                                           | This study     | <b>SU829</b>  |

**Table S1: Strains used in this study**

| Reference               | SEQUENCE                                                                           | Construct                                       |
|-------------------------|------------------------------------------------------------------------------------|-------------------------------------------------|
| SU023_ada_LambdaRed     | CGCCAGTGGCTCTTGCCACGGTTCAGCATCGGCAACAGATCCAA<br>CATTACCTCTCCTCATAATATCCTCCTTAGTTCC | LambdaRed insertion at Ada C-ter                |
| SU024_ada_LambdaRed     | TAAAGCGCAACTGCTGCGCGCGAAGCTGAAAATGAGGAGAGGT<br>CGGCTGGCTCCGCTGC                    | LambdaRed insertion at Ada C-ter                |
| SU025_ada_seq           | ATCTGGCGAAACGGCGACTG                                                               | Sequencing of lambdaRed insertion at Ada C-ter  |
| SU026_ada_seq           | TGAAACCGTCAGTTATCAGC                                                               | Sequencing of lambdaRed insertion at Ada C-ter  |
| SU027_alkA_LambdaRed    | CCAGGCCGATAAGGCGCTCGCACCGCATCCGGCGACCAACGAA<br>TATCCTCCTTAGTTCC                    | LambdaRed insertion at AlkA C-ter               |
| SU028_alkA_LambdaRed    | GTTGCATATCTGGTATACGGAAGGCTGGCAACCAGACGAAGCATC<br>GGCTGGCTCCGCTGC                   | LambdaRed insertion at AlkA C-ter               |
| SU029_alkA_seq          | GGTGAGGTGATTGCCGATGC                                                               | Sequencing of lambdaRed insertion at AlkA C-ter |
| SU030_alkA_seq          | CTTTGCGTGGCTGGCAGGCG                                                               | Sequencing of lambdaRed insertion at AlkA C-ter |
| SU266_Fw_AlkB_LambdaRed | CCATCGACTGCCGCTACAACCTGACATTCGGTCAGGCAGGTAAAA<br>AAGAATCGGCTGGCTCCGCTGC            | LambdaRed insertion at AlkB C-ter               |
| SU267_Rv_AlkB_LambdaRed | CAGCCCCAGTTTAAACATCTTCGCGCGCACAGCAATAATAATTCT<br>TATTTAATATCCTCCTTAGTTCC           | LambdaRed insertion at AlkB C-ter               |
| SU268_Fw_AlkB_Seq       | CGATTTTCAATTTGGCGGCC                                                               | Sequencing of lambdaRed insertion at AlkB C-ter |
| SU269_Rv_AlkB_Seq       | GATAAGGCGCTGATTGATAAAAGC                                                           | Sequencing of lambdaRed insertion at AlkB C-ter |
| SU374_Fw_Ada_A38C       | AGGCATCTTTTGGCGTCCGCTTTGC                                                          | Ada A38C substitution into pMV007               |
| SU339_Rv_Ada_A38C       | GTGGTACGCACGGCGAAA                                                                 | Ada A38C substitution into pMV007               |

|                        |                                                                                |                                                                |
|------------------------|--------------------------------------------------------------------------------|----------------------------------------------------------------|
| SU349_Fw-del-ada-alkB  | CCTGGATGTCACCACAGTTTAAAAGCTTCCTTGTCAGCGAAAAA<br>ATTAAGTGTAGGCTGGAGCTGCTTC      | LambdaRed deletion of ada-alkB (kan selection)                 |
| SU350_Rv-del-ada-alkB  | AGCCCGCAGTTTAAACATCTTCGCGCGCACAGCAATAATAATTCTT<br>ATTCATATGAATATCCTCCTTAG      | LambdaRed deletion of ada-alkB (kan selection)                 |
| SU398_Fw_pAda-Ada-AlkB | AACCTGGATGTCACCACAGTTTAAAAGCTTCCTTGTCAGCGAAAA<br>AAATTAAGCGCAAGATTGTTGGTTTTTGC | Lambda Red insertion of Ada variant in ada-alkB (Cm selection) |
| SU399_Rv_pAda-Ada-AlkB | CACACTGATAAATGGCCAGCGATACTGCCGCCAGACAAGTACAAG<br>AAGTTCATCACCAGGCGTTAAGGGCAC   | Lambda Red insertion of Ada variant in ada-alkB (Cm selection) |

**Table S2: Primers used in this study**
